# Supplementary material for: Concentrations, sources and temporal trends in atmospheric polycyclic aromatic hydrocarbons in a major conurbation
Source: Royal Society of Chemistry journal article supplement (doi:10.1039/b503983e), 2005-01-01

Supplementary material (ESI) for JEM  
This journal is © 2005 Royal Society of Chemistry

**ESI for Harrad and Laurie, 2005.**

**CONCENTRATIONS, SOURCES AND TEMPORAL TRENDS IN ATMOSPHERIC POLYCYCLIC AROMATIC  
HYDROCARBONS IN A MAJOR CONURBATION**

**Comparison of PAH Concentrations (ng m<sup>-3</sup> – sum of both phases) at EROS in 1997 and 1999-2000**

| <b>Compound</b>                     | <b>Average1997</b> | <b>Average 1999-2000</b> | <b>p Value</b> |
|-------------------------------------|--------------------|--------------------------|----------------|
| Acenaphthylene                      | 1.7                | 0.79                     | >0.05          |
| Acenaphthene                        | 0.67               | 0.56                     | >0.05          |
| Fluorene                            | 4.4                | 3.6                      | >0.05          |
| Phenanthrene                        | 11.9               | 8.8                      | 0.02           |
| Anthracene                          | 1.2                | 0.93                     | >0.05          |
| Fluoranthene                        | 4.5                | 2.1                      | <0.001         |
| Benzo[ <i>a</i> ]Anthracene         | 0.39               | 0.26                     | >0.05          |
| Chrysene                            | 0.66               | 0.49                     | >0.05          |
| Benzo[ <i>b+j+k</i> ]Fluoranthene   | 1.1                | 0.92                     | >0.05          |
| Benzo[ <i>a</i> ]Pyrene             | 0.50               | 0.32                     | >0.05          |
| Indeno[ <i>1,2,3-cd</i> ]Pyrene     | 0.57               | 0.34                     | >0.05          |
| Dibenzo[ <i>a,h+a,c</i> ]Anthracene | 0.11               | 0.08                     | >0.05          |
| Benzo[ <i>g,h,i</i> ]Perylene       | 0.75               | 0.56                     | >0.05          |
| ΣPAH                                | 28.5               | 19.8                     | >0.05          |

**Figure Captions**

Figure 1: Back Trajectory for Sampling Event Commencing 12/10/99 (Top: 5-day back trajectory, Bottom: 1-day back trajectory)

Figure 2: Back Trajectory for Sampling Event Commencing 5/06/00 (Top: 5-day back trajectory, Bottom: 1-day back trajectory)

Figure 3: Back Trajectory for Sampling Event Commencing 29/08/00 (Top: 5-day back trajectory, Bottom: 1-day back trajectory)

Figure 4: Back Trajectory for Sampling Event Commencing 26/10/99 (Top: 5-day back trajectory, Bottom: 1-day back trajectory)

Figure 1

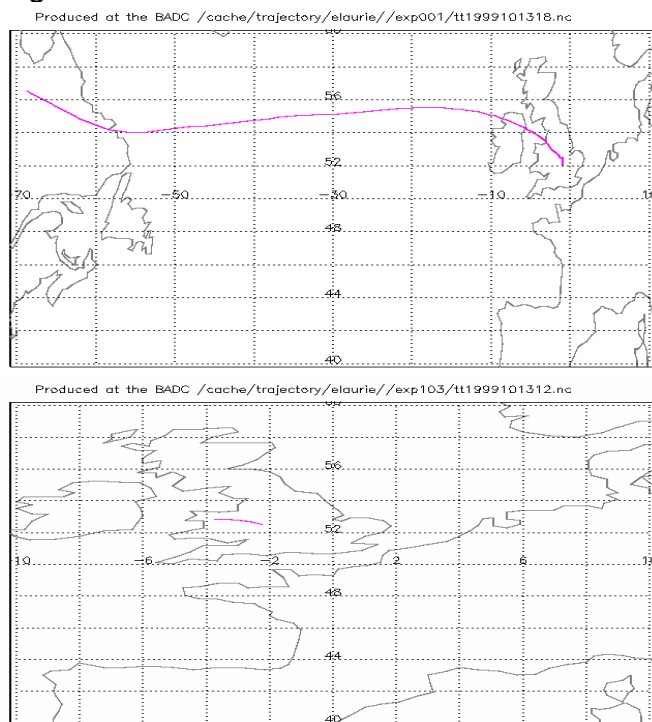

Figure 2

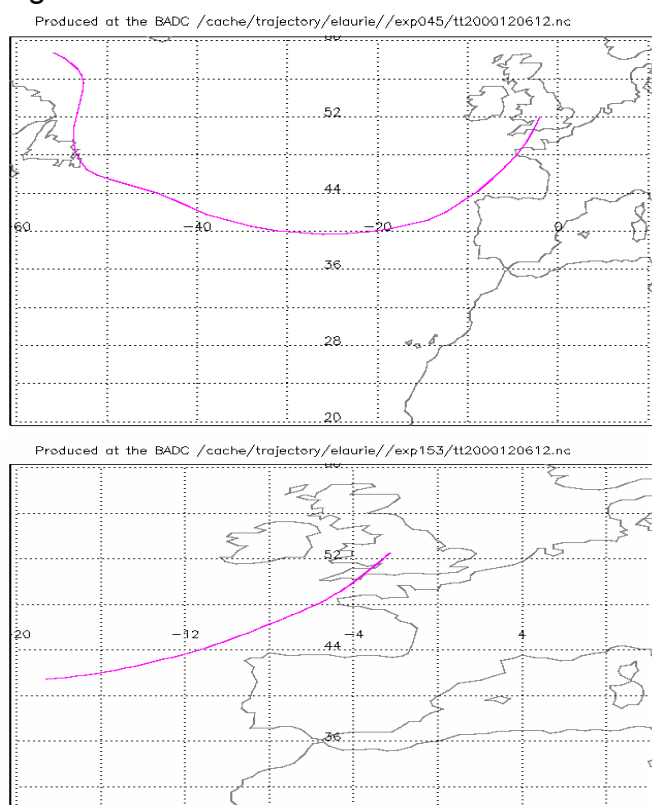

Figure 3

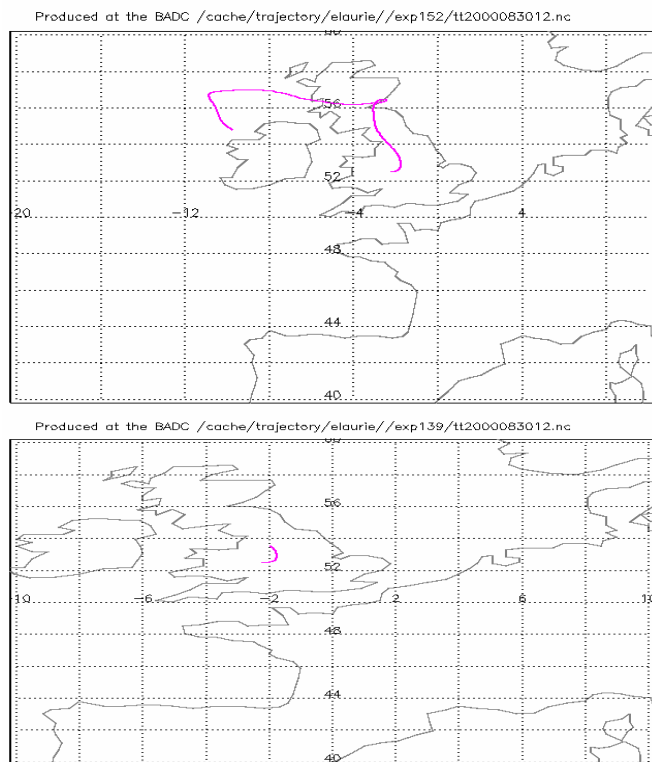

Figure 4

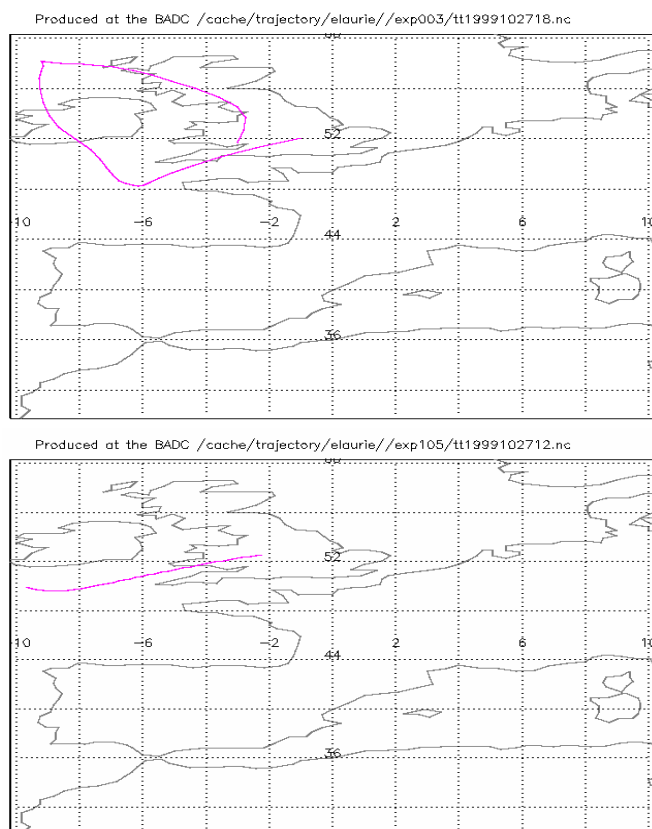

Supplement: b503983e-esi.pdf [file b503983e-esi.pdf]
